# Supplementary material for: Amorphous aggregates with a very wide size distribution play a central role in crystal nucleation
Source: Royal Society of Chemistry journal article supplement (doi:10.1039/d4sc00452c), 2024-01-01
Supplement: d4sc00452c1.pdf [file d4sc00452c1.pdf]

# Supplementary Materials for Amorphous aggregates with a very wide size distribution play a central role in crystal nucleation

Zhiyu Liao,<sup>1</sup> Ankita Das,<sup>1</sup> Christina Glen Robb,<sup>2</sup> Rebecca Beveridge,<sup>2</sup> and Klaas Wynne<sup>1</sup>

<sup>1</sup>School of Chemistry, University of Glasgow, G12 8QQ, UK

<sup>2</sup>Dept. of Pure and Applied Chemistry, University of Strathclyde, Glasgow G1 1XL, UK

**Table S1.** Fitting parameters for the distributions shown in Fig. 1(d) of the main text.

|      | A <sub>1</sub> | τ <sub>1</sub>             | β <sub>1</sub> | A <sub>2</sub> | τ <sub>2</sub> | β <sub>2</sub> | R <sup>2</sup> |
|------|----------------|----------------------------|----------------|----------------|----------------|----------------|----------------|
| 20°C | 0.617668       | 2.33869 x 10 <sup>-6</sup> | 0.89539        | 0.112          | 0.000266301    | 0.82           | 0.999915       |
| 30°C | 0.60059        | 1.86572 x 10 <sup>-6</sup> | 0.895285       | 0.143          | 0.000247653    | 0.86           | 0.999838       |
| 40°C | 0.612798       | 1.41361 x 10 <sup>-6</sup> | 0.89475        | 0.119          | 0.000164014    | 0.84           | 0.999891       |
| 50°C | 0.667717       | 1.04892 x 10 <sup>-6</sup> | 0.832901       | 0.0916         | 0.000139757    | 0.92           | 0.999805       |
| 60°C | 0.670747       | 8.44093 x 10 <sup>-7</sup> | 0.865552       | 0.052          | 0.000104783    | 0.93           | 0.999585       |
| 70°C | 0.73944        | 5.7833 x 10 <sup>-7</sup>  | 0.817092       | 0.0176         | 0.000114066    | 0.91           | 0.999589       |

**Table S2. Aggregate formation in supersaturated solution.** Summary of aggregate formation and laser-induced nucleation in the investigated amino acids and peptides demonstrating the general nature of the formation of aggregates and their role in laser-induced nucleation.

|                 | Solubility in H <sub>2</sub> O at 298 K <sup>1</sup> | Prepared in D <sub>2</sub> O/H <sub>2</sub> O at 293 K (pD/pH) <sup>a</sup> | Aggregate seen under microscope | Laser-induced nucleation |
|-----------------|------------------------------------------------------|-----------------------------------------------------------------------------|---------------------------------|--------------------------|
| L-histidine     | 0.0436 g/mL                                          | 0.13 g/mL (7.72)                                                            | Y                               | Y                        |
| L-phenylalanine | 0.028 g/mL                                           | 0.05 g/mL (6.23)                                                            | Y                               | Y                        |
| L-threonine     | 0.0979 g/mL                                          | 0.2 g/mL (6.20)                                                             | Y                               | N                        |
| L-arginine      | 0.1959 g/mL                                          | 0.3 g/mL (11.63)                                                            | N                               | N                        |
| L-alanine       | 0.1663 g/mL                                          | 0.18 g/mL (5.74)                                                            | Y                               | Y                        |
| L-lysine        | 0.2466 g/mL                                          | 0.5 g/mL (10.72)                                                            | Y                               | Y                        |
| L-serine        | 0.3657 g/mL                                          | 0.4 g/mL (6.00)                                                             | Y                               | Y                        |
| L-proline       | 1.3 g/mL                                             | 1.7 g/mL (7.44)                                                             | Y                               | N                        |
| L-glutamic acid | 0.0425 g/mL                                          | 0.13 g/mL (7.02)                                                            | Y                               | Y                        |
| Ala-Ala         | 0.29 g/mL <sup>2</sup>                               | 0.3 g/mL (5.74)                                                             | Y                               | Y                        |
| Gly-Gly         | 0.195 g/mL <sup>2</sup>                              | 0.2 g/mL (5.89)                                                             | Y                               | Y                        |
| Gly-Gly-Gly     | 0.061 g/mL <sup>2</sup>                              | 0.1 g/mL (5.78)                                                             | Y                               | Y                        |

<sup>a</sup>Values of pD/pH are measured at 293 K after preparation of solutions.

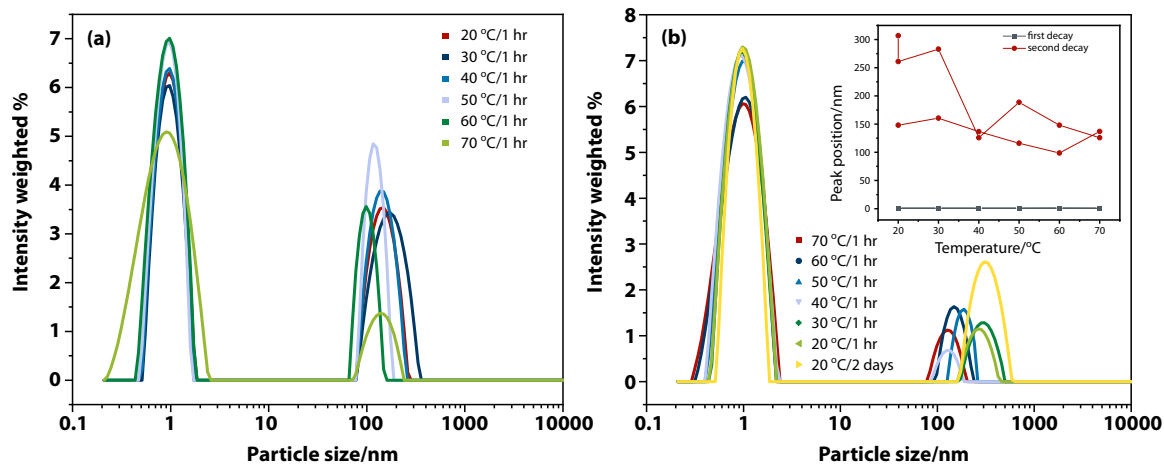

**Fig. S1.** Intensity weighted size distribution of the intensity correlation functions shown in Fig. 1. (a) Warm up from 20°C to 70°C; (b) Cooling down from 70°C to 20°C. The inset shows the changes in the peak position as a function of temperature.

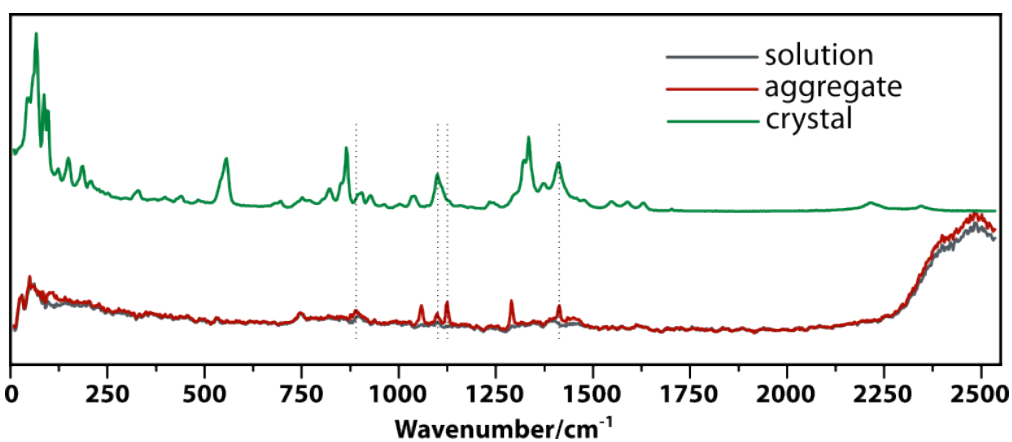

**Fig. S2.** Raman spectrum of threonine aggregates in solution compared to the surrounding solution and crystal.

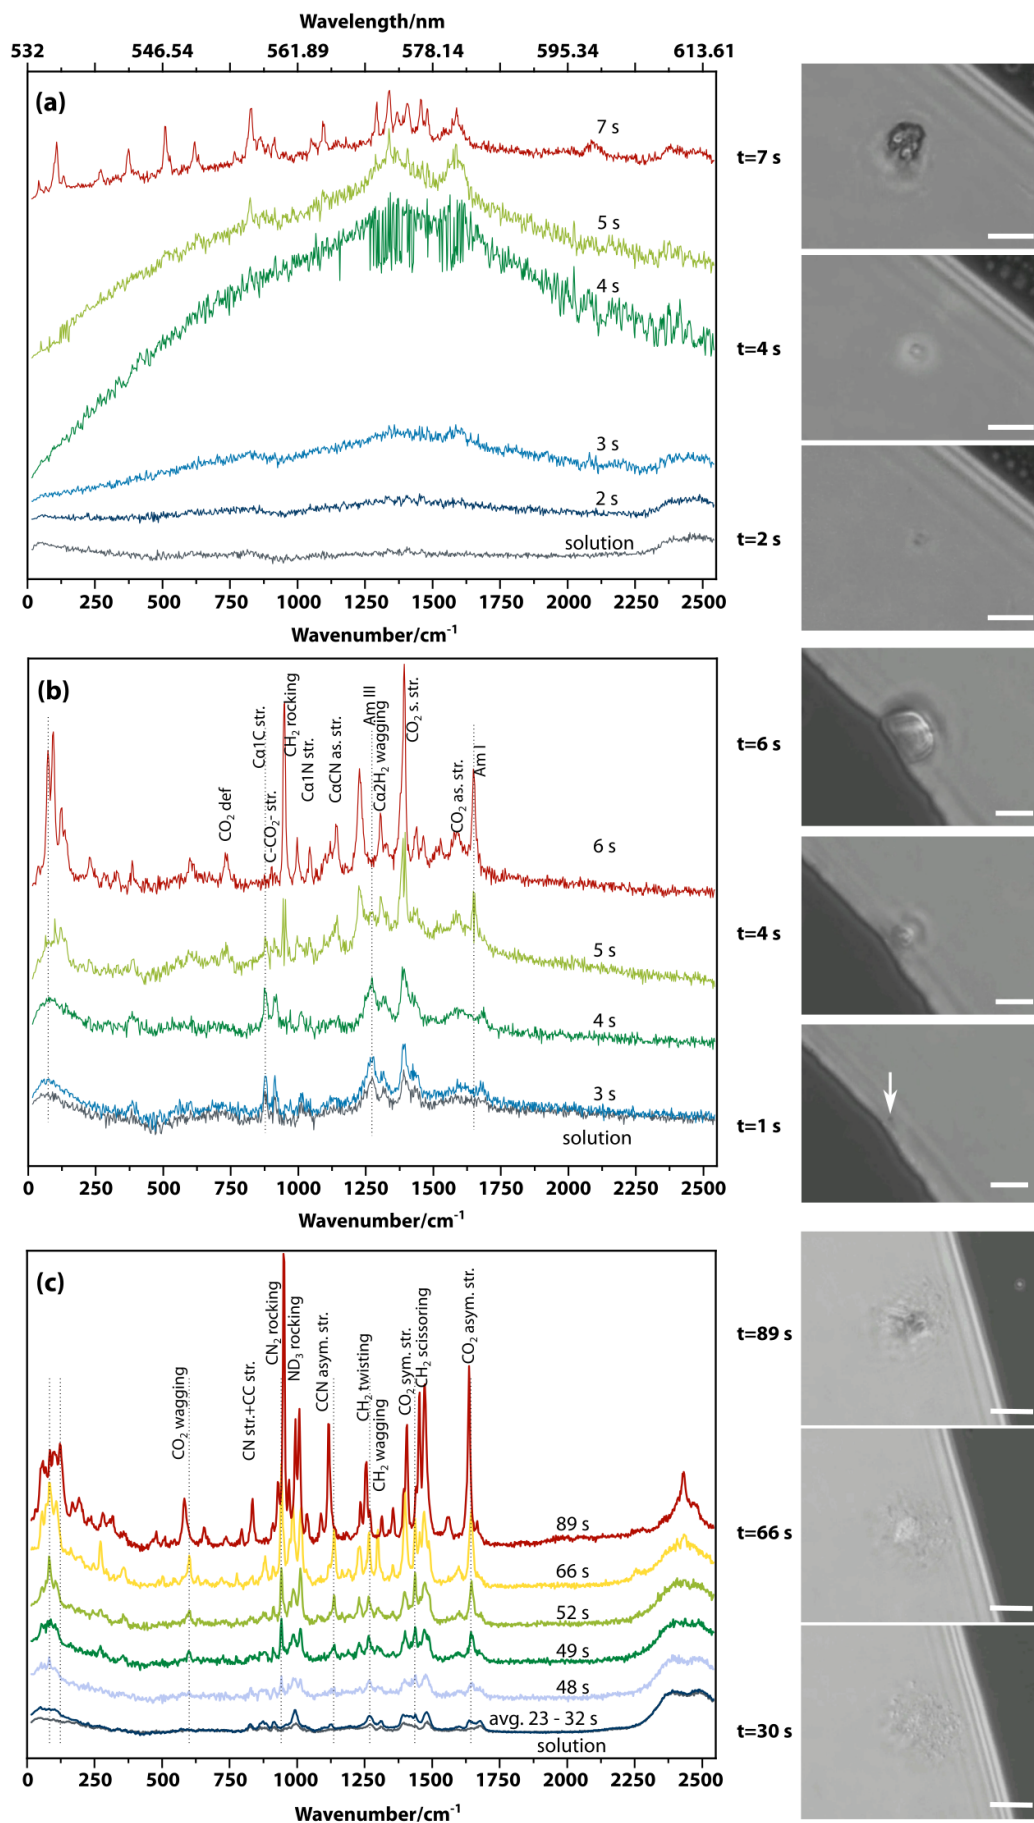

**Fig. S3. Amorphous aggregates are essential to laser-induced nucleation in amino acid and peptide solutions.** Aggregate-assisted laser-induced nucleation from solution: (a) alanine, (b) Gly-Gly and (c) Gly-Gly-Gly. Shown are time-dependent Raman and luminescence spectra on the left, along with phase-contrast microscopy images at selected times on the right (scale bars, 5 μm). The burst of luminescence in (a) at approximately 4 s and in (c) at approximately 66 s is likely due to crystalloluminescence.<sup>3</sup>

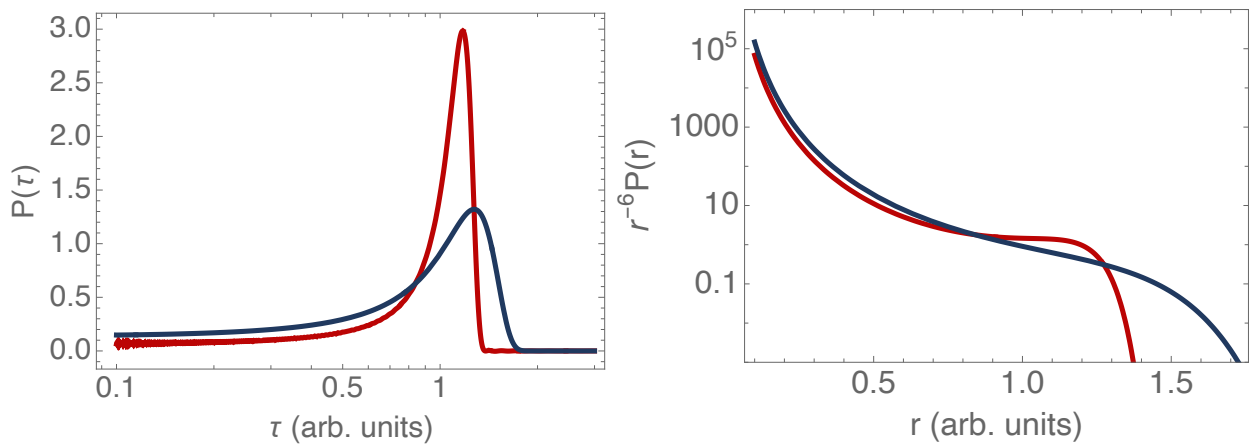

**Fig. S4. Relaxation time vs. particle size distribution.** (left) The relaxation-time ( $\tau$ ) distribution corresponding to a stretched exponential with overall relaxation time  $\tau_0 = 1$  for stretch parameters  $\beta = 0.95$  (red) and  $\beta = 0.9$  (blue). The relaxation time is related to the particle size through the Stokes-Einstein law,  $r \propto \tau$ . (right) Particle size ( $r$ ) distribution for the same parameter values (see main text for explanation).

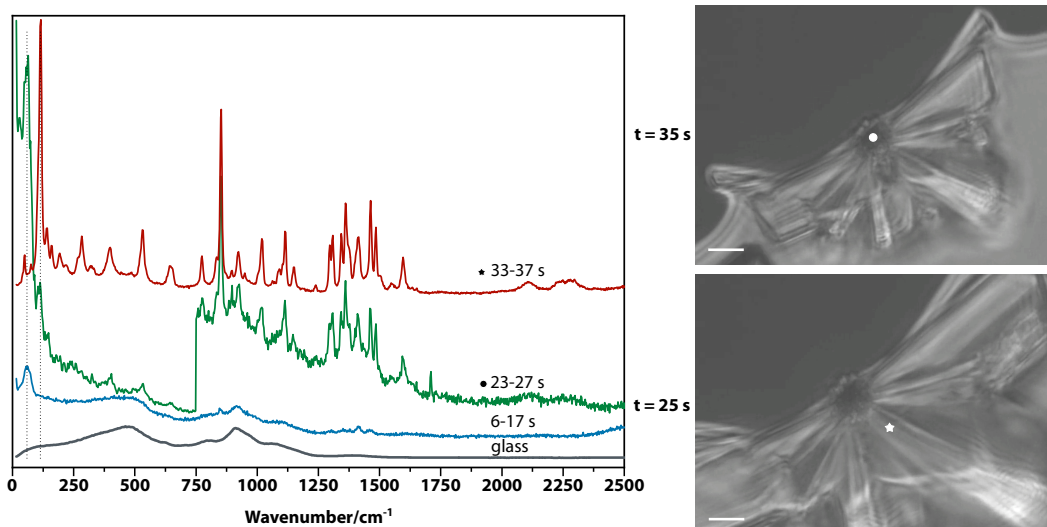

**Fig. S5. Aggregate-assisted laser-induced nucleation of alanine from solution.** Averaged Raman spectra are shown on the left, along with microscopy images at selected times on the right. The green spectrum is 5 $\times$  magnified from 750 – 2500  $\text{cm}^{-1}$  for comparison with better clarity; dot and star signs indicate the locations where spectra are taken. Scale bar, 5  $\mu\text{m}$ .

## Supplementary note

### Classical nucleation theory (CNT)

#### The basic Gibbs equation

Homogeneous crystal nucleation begins with the growth of a nucleus with radius  $r$ . The free energy is the sum of a term proportional to the surface area and a term proportional to the volume. Thus, the change in free energy for a spherical nucleus is given by<sup>4</sup>

$$\Delta G(r) = \frac{4}{3}\pi r^3 \Delta G_f + 4\pi r^2 \gamma_{sl}, \quad (\text{S1})$$

Where  $\Delta G_f$  is the change in Gibbs free energy per unit volume of the solid phase vs. the liquid/solution phase (the free energy of formation) and  $\gamma_{sl}$  the interfacial energy (or surface free energy or interfacial tension). A typical interfacial energy is about  $10^{-3}$  J/m<sup>2</sup>.  $\Delta G_f$  can be written in terms of the latent heat (heat of fusion) as

$$\Delta G_f = -\frac{\Delta H_f \Delta T}{T_f}, \quad (\text{S2})$$

where  $\Delta T = T_f - T$  is the degree of supercooling (supersaturation) and  $T_f$  the melting (liquidus) temperature. It can also be written in terms of the supersaturation as

$$\Delta G_f = -\frac{k_B T}{\Omega} \ln S, \quad (\text{S3})$$

where  $\Omega$  is the molecular volume in the crystal (volume of 1 mol of substance), and  $S$  the supersaturation here defined by

$$S \equiv \frac{C}{C_s}, \quad (\text{S4})$$

where  $C$  is the concentration of the solute and  $C_s$  the saturation concentration or solubility. The molecular volume can be calculated from

$$\Omega = \frac{M}{1000 \rho N_A} \quad (\text{S5})$$

(in m<sup>3</sup>/molecule), where  $M$  is the molar mass (in g/mol), and  $\rho$  the density of the crystal (in kg/m<sup>3</sup>). Thus, when the concentration is equal to the equilibrium concentration ( $S = 1$ ),  $\Delta G_f = 0$ , whereas in a supersaturated solution ( $C > C_0$ ),  $\Delta G_f$  is negative favouring nucleation.

Hence, the equation for the change in free energy for a spherical nucleus with radius  $r$  (Eq. (S1)) can be written in terms of the supersaturation as

$$\Delta G(r) = -k_B T \frac{4\pi r^3}{3\Omega} \ln S + 4\pi r^2 \gamma_{sl}. \quad (\text{S6})$$

The number of molecules contained in the nucleus is

$$n_{\text{nucleus}} = \frac{4\pi r^3}{3\Omega}. \quad (\text{S7})$$

Thus, the change in free energy per nucleus can also be written as

$$\Delta G(n_{\text{nucleus}}) = -k_B T n_{\text{nucleus}} \ln S + 6^{2/3} \pi^{1/3} (n_{\text{nucleus}} \Omega)^{2/3} \gamma_{sl}. \quad (\text{S8})$$

Here, we propose that the free energy of formation can be written as

$$\Delta G_f / \Delta G_f^0 = (1 - \delta) e^{-r/\lambda} + \delta \quad (\text{S9})$$

where  $\lambda$  is the fractal correlation length and  $\delta$  accounts for the possibility that the free energy of formation decays to a finite value. Using Eq. (S9) with (S3) and (S6), we get the expression

$$\Delta G(r) = -k_B T \frac{4\pi r^3}{3\Omega} [(1 - \delta) e^{-r/\lambda} + \delta] \ln S + 4\pi r^2 \gamma_{sl} \quad (\text{S10})$$

Typical parameters for an organic molecule are those of glycine, which has a molecular volume of 0.107 nm<sup>3</sup>. Typical interfacial tensions range from about 0.1 to 10 mJ/m<sup>2</sup>. A reasonable supersaturation is  $S = 1.1$ , so a reasonable value for  $\Delta G_f$  is  $-3.9 \cdot 10^6$  J/m<sup>3</sup>. Some typical average numbers are given in the table below.

|               |                                                    |
|---------------|----------------------------------------------------|
| T             | 298 K                                              |
| $\Omega$      | 0.1 nm <sup>3</sup> ( $10^{-28}$ m <sup>3</sup> )  |
| $\gamma$      | 1 mJ/m <sup>2</sup> ( $10^{-3}$ J/m <sup>2</sup> ) |
| $-\Delta G_f$ | 1 MJ/m <sup>3</sup> ( $10^6$ J/m <sup>3</sup> )    |

#### Reduction of S during crystal growth

When a crystal starts growing, the supersaturation parameter must of course decrease. The number of molecules available in the solution at the start is,

$$n_{\text{solution},0} = C_0 10^3 V N_A \quad (\text{S11})$$

and hence the number of molecules in the (remaining) solution is

$$n_{\text{solution},0} - n_{\text{nucleus}} = C_0 10^3 V N_A - \frac{4\pi r^3}{3\Omega}. \quad (\text{S12})$$

The concentration of the (remaining) solution is

$$C = \frac{n_{\text{solution},0} - n_{\text{nucleus}}}{10^3 V N_A} = C_0 - \frac{4\pi r^3}{3000 V N_A \Omega}, \quad (\text{S13})$$

where  $C_0$  is the initial concentration ( $C$  and  $C_0$  both in M) and  $V$  the volume (in m<sup>3</sup>). If the initial supersaturation is

$$S_0 = \frac{C_0}{C_s} \quad (\text{S14})$$

then the  $r$ -dependent supersaturation is

$$S = S_0 - \frac{4\pi r^3}{3000V N_A \Omega C_S}. \quad (\text{S15})$$

When including this effect, one would expect the free energy to minimise for a crystal of such a size that it has reduced the supersaturation to  $S=1$ .

$$1 = S_0 - \frac{4\pi r^3}{3000V N_A \Omega C_S}, \quad (\text{S16})$$

which gives

$$r_{S=1} = \sqrt[3]{(S_0 - 1) C_S \frac{3000V N_A \Omega}{4\pi}}. \quad (\text{S17})$$

This turns out to be not quite the case: the minimum always occurs quite a bit before the value predicted by Eq. (S16). However, the free energy has a zero crossing at

the value predicted by Eq. (S16). Thus, in Fig. 5, the minimum occurs for a crystal of radius  $\sim 0.9$  mm where  $S = 1.049$ , while the supersaturation only decreases to  $S=1$  for  $r = 1.13$  mm. The barrier peaks at the critical radius of  $\sim 1$  nm.

## References

- 1 Michel Fleck , Aram M. Petrosyan, *Salts of amino acids. Crystallization, Structure and Properties*, Cham, Switzerland: Springer International Publishing, 2014.
- 2 H. Tam Do, Y. Zen Chua, J. Habicht, M. Klinksiek, M. Hallermann, D. Zaitsau, C. Schick and C. Held, *RSC Adv.*, 2019, **9**, 32722–32734.
- 3 A. J. Alexander, *J. Chem. Phys.*, 2012, **136**, 064512.
- 4 S. Karthika, T. K. Radhakrishnan and P. Kalaichelvi, *Cryst. Growth Des.*, 2016, **16**, 6663–6681.

**Movie S1.**

Aggregate-assisted laser-induced nucleation of alanine from solution (0.18 g/mL in D<sub>2</sub>O, 5 days old).

**Movie S2.**

Aggregate-assisted laser-induced nucleation of Gly-Gly from solution (0.2 g/mL in H<sub>2</sub>O, 2 days old).

**Movie S3.**

Aggregate-assisted laser-induced nucleation of Gly-Gly-Gly from solution (0.1 g/mL in D<sub>2</sub>O, 1 day old).

**Movie S4.**

Aggregate-assisted laser-induced nucleation of Ala-Ala from solution (0.3 g/mL in D<sub>2</sub>O, 1 day old).

**Movie S5.**

Aggregate-assisted laser-induced nucleation of serine from solution (0.4 g/mL in D<sub>2</sub>O, 1 day old).

**Movie S6.**

Aggregate-assisted laser-induced nucleation of glutamic acid from solution (0.13 g/mL in H<sub>2</sub>O, 2 days old).

**Movie S7.**

Aggregate-assisted laser-induced nucleation of phenylalanine from solution (0.05 g/mL in H<sub>2</sub>O, 2 days old).

**Movie S8.**

Aggregate-assisted laser-induced nucleation of lysine from solution (0.5 g/mL in H<sub>2</sub>O, 2 days old).

**Movie S9.**

Aggregate-assisted laser-induced nucleation of histidine from solution (0.13 g/mL in H<sub>2</sub>O, 1 day old).

**Movie S10.**

Evaporation-driven spontaneous nucleation of Gly-Gly-Gly.

**Movie S11.**

Evaporation-driven spontaneous homogeneous nucleation of Gly-Gly-Gly (5× speed).

**Movie S12.**

Evaporation-driven spontaneous nucleation of histidine.

**Movie S13.**

Evaporation-driven spontaneous nucleation of alanine (5× speed).

**Movie S14.**

Evaporation-driven spontaneous nucleation of histidine.
